# Supplementary material
Source: Research Square preprint supplement (doi:10.21203/rs.3.rs-8916970/v1)
Supplement: Supplementary file 1 [file 5ced00bd7c2d97d0c6c4ef80.docx]

**Supplementary Table1**

| Genes | Primers |
| --- | --- |
| *β-actin* | F 5’ TTGTAACCAACTGGGACGATATGG 3’ |
|  | R 5’ GATCTTGATCTTCATGGTGCTAGG 3’ |
| *Enam* | F 5’ GGTGTCTTCCCTCTCCCTAAA 3’ |
|  | R 5’ AGTGGTTTGCCATTGTCTTTCT 3’ |
| *Amelx* | F 5’ AGCTTTTGCTATGCCCCTACC 3’ |
|  | R 5’ GATGAGGCTGAAGGGTGTGACT 3’ |
| *Ambn* | F 5’ CTGCTCCTGTTCCTGTCCCTA 3’ |
|  | R 5’ GCTTCCCAACTGTCTCATTGTC 3’ |
| *Ki67* | F 5’ AACCAGGACTTTGTGCTCTGTAA 3’ |
|  | R 5’ CTCTTTTGGCTTCCATTTCTTC 3’ |
| *Ccnb1* | F 5’ TGATACTCCCTCTCCAAGCC 3’ |
|  | R 5’ AATGCACCATGTCGTAGTCC 3’ |
| *Pcna* | F 5’ GAGCAACTTGGAATCCCAGAACAGG 3’ |
|  | R 5’ CCAAGCTCCCCACTCGCAGAAAACT 3’ |
| *Sox2* | F 5’ AGTGGTACGTTAGGCGCTTC 3’ |
|  | R 5’ ATCGCCCGGAGTCTAGTTCT 3’ |
| *Oct3/4* | F 5’ AGGCAGGAGCACGAGTGGA 3’ |
|  | R 5’ CGAAGCGGCAGATGGTTGT 3’ |
| *Dgki* | F 5’ GGTACCTGAATCCACGGCAA 3’ |
|  | R 5’ TGCCCCCGCATAGAACATTT 3’ |
| *Dgkk* | F 5’ ATTGAGCGACCCAAGAGGTG 3’ |
|  | R 5’ AAACCAGAACGCGAAAACGG 3’ |
| *pla2g2a* | F 5’ GTGCCAGTGCGATAAAGCTG 3’ |
|  | R 5’ TCTAGGGTTGGAGAGGGGTG 3’ |
| *pla2g2c* | F 5’ GCTTAGCTGGGAACTACGCA 3’ |
|  | R 5’ TGTTCTAACAGCACCCCACC 3’ |
